# Supplementary material
Source: PubMed Central journal article supplement (PMC5107210)
Supplement: NIHMS823218-supplement-25.pdf [file NIHMS823218-supplement-25.pdf]

**Table S1. Age and ethnicity of tissue samples with additional information**

**Reduction mammoplasty tissues used to isolate and characterize ePS cells**

| RM           | AGE | Ethnicity | SON qRT-PCR | SON WB    | SON ICC  | IHC multiplex analysis | ICC for stem cell markers | SON knock down | CD73/Ado analysis | AdoRa analysis | PKA/Stat3 analysis | FGF2 analysis | Activin A analysis | Inhibitor analysis | Comparison of ePS with ESC |
|--------------|-----|-----------|-------------|-----------|----------|------------------------|---------------------------|----------------|-------------------|----------------|--------------------|---------------|--------------------|--------------------|----------------------------|
| 083          | 37  | Asia      |             |           |          | 1                      |                           |                |                   |                |                    |               |                    |                    |                            |
| 085          | 38  | African   | *           | *         | *        | 1                      |                           |                |                   |                |                    |               |                    |                    |                            |
| 122          | 30  | African   | 11          | 2         | 1        | 1                      |                           |                | x                 |                |                    |               |                    |                    |                            |
| 128          | 20  | African   | 11          | 2         | 1        | 1                      |                           |                | x                 |                |                    |               |                    |                    |                            |
| 136          | 32  | Caucasian | 18          | 2         |          |                        |                           |                |                   | x              | x                  | x             | x                  |                    |                            |
| 142          | 26  | Unknown   | 9           | 2         |          | 1                      |                           |                |                   | x              |                    |               |                    |                    | x                          |
| 159          | 30  | African   | 15          | 5         |          | 1                      |                           | x              |                   |                | x                  | x             | x                  |                    |                            |
| 165          | 31  | Caucasian | 3           | 3         |          |                        |                           |                |                   |                |                    | x             |                    |                    |                            |
| 172          | 20  | African   | 3           | 3         | 1        | 1                      | 1                         |                |                   |                |                    |               |                    | x                  |                            |
| 177          | 39  | African   | 3           | 2         |          | 1                      |                           | x              |                   |                |                    |               |                    |                    | x                          |
| 179          | 34  | Caucasian |             |           |          | 1                      |                           |                |                   |                |                    |               |                    |                    |                            |
| 183          | 20  | Caucasian | 3           | 3         | 1        | 1                      | 1                         |                |                   |                |                    |               |                    | x                  |                            |
| 209          | 38  | Caucasian | 3           | 3         |          | 1                      |                           |                |                   |                |                    | x             |                    |                    |                            |
| <b>Total</b> |     |           | <b>79</b>   | <b>27</b> | <b>4</b> | <b>11</b>              | <b>2</b>                  |                |                   |                |                    |               |                    |                    |                            |

x: the n number for mutiple components of a specific analysis can be found in the figure legends

\*: data published in (11).
