# Supplementary material
Source: PubMed Central journal article supplement (PMC5107210)
Supplement: NIHMS823218-supplement-26.pdf [file NIHMS823218-supplement-26.pdf]

**Table S2. Reagent information**

| Reagent                                                               | Vendor                              | Catalog #    |
|-----------------------------------------------------------------------|-------------------------------------|--------------|
| <b>MISCELLANEOUS REAGENTS</b>                                         |                                     |              |
| adenosine 5'-(alpha,beta-methylene)diphosphate                        | Sigma-Aldrich, MO                   | M3763        |
| Adenosine (Ado)                                                       | Sigma-Aldrich, MO                   | A4036        |
| 5'-(N-Ethylcarboxamido)adenosine (NECA)                               | Sigma-Aldrich, MO                   | E2387        |
| 8-Bromoadenosine 3',5'-cyclic monophosphate (8-Br-cAMP)               | Sigma-Aldrich, MO                   | B5386        |
| Forskolin                                                             | Cayman, MI                          | 11018        |
| Activin A                                                             | Sigma-Aldrich, MO                   | A4941        |
| FGF2                                                                  | Globalstem, MD                      | GSR-2001     |
| Interleukin-6 (IL6)                                                   | Sigma-Aldrich, MO                   | I1395        |
| Follistatin                                                           | Sigma-Aldrich, MO                   | F1175        |
| MEGM                                                                  | Lonza, Switzerland                  | CC-3051      |
| Polybrene                                                             | Sigma-Aldrich, MO                   | 107689       |
| Puromycin                                                             | Sigma-Aldrich, MO                   | P8833        |
| <b>PATHWAY ACTIVATORS OR INHIBITORS</b>                               |                                     |              |
| 1,3-Dimethyl-8-phenylxanthine (8-PT)                                  | Sigma-Aldrich, MO                   | P2278        |
| MRS 1754 hydrate                                                      | Sigma-Aldrich, MO                   | M6316        |
| 3,7-Dimethyl-1-propargylxanthine (DMPX)                               | Sigma-Aldrich, MO                   | D134         |
| VUF 5574                                                              | Sigma-Aldrich, MO                   | V558         |
| H-89 dihydrochloride hydrate (H89)                                    | Sigma-Aldrich, MO                   | B1427        |
| 8-Bromoadenosine 3,5-cyclic monophosphate (8-Br-cAMP)                 | Sigma-Aldrich, MO                   | B5386        |
| STATTC (ST)                                                           | R&D systems, MN                     | 2796         |
| Ruxolitinib                                                           | Cayman, MI                          | 11609        |
| SB431543 (SB)                                                         | Sigma-Aldrich, MO                   | S4317        |
| STATTC (ST)                                                           | R&D systems, MN                     | 2796         |
| PD173074                                                              | Cayman, MI                          | 13032        |
| <b>PLASMIDS</b>                                                       |                                     |              |
| Lentiviral plasmid expressing CD73-Flag                               | Origene, MD                         | RC209568     |
| Lentiviral plasmid expressing short hairpin for Oct3/4                | Dharmacon, CO                       | V2LHS_222507 |
| Lentiviral plasmid expressing short hairpin for Nanog                 | Dharmacon, CO                       | V2LHS_193422 |
| Lentiviral plasmid expressing short hairpin for Sox2                  | Dharmacon, CO                       | V2LHS_153337 |
| Lentiviral plasmid expressing short hairpin for CD73                  | Dharmacon, CO                       | V3THS_359876 |
| Lentiviral plasmid expressing short hairpin for AdoRa 2b              | Dharmacon, CO                       | V2THS_111961 |
| Lentiviral plasmid expressing short hairpin for Stat3                 | Dharmacon, CO                       | V3THS_376016 |
| Lentiviral plasmid expressing short hairpin for Stat3                 | Dharmacon, CO                       | V3THS_376017 |
| <b>ANTIBODIES</b>                                                     |                                     |              |
| <b>for FACS-based cell sorting</b>                                    |                                     |              |
| anti-CD73 labeled with PE (phycoerythrin)                             | BD Biosciences, CA                  | 550257       |
| anti-CD90 labeled with APC (allophycocyanin) (BD Biosciences; 559869) | BD Biosciences, CA                  | 559869       |
| anti-CD2                                                              | BD Biosciences, CA                  | 555325       |
| anti-CD3                                                              | BD Biosciences, CA                  | 555338       |
| anti-CD16                                                             | BD Biosciences, CA                  | 555405       |
| anti-CD64                                                             | BD Biosciences, CA                  | 555526       |
| anti-CD31                                                             | Invitrogen, CA                      | MHCD3115     |
| anti-CD45                                                             | BioLegend, CA                       | 304003       |
| anti-CD140b                                                           | BioLegend, CA                       | 323604       |
| anti-human secondary antibody coupled to Pacific Blue (PB)            | Invitrogen, CA                      | S11222       |
| goat anti-Rabbit secondary antibody (Alexa 647)                       | Life Technologies, CA               | A-21244      |
| <b>for immunocytochemistry, Western blotting and cell assays</b>      |                                     |              |
| anti-IL6 neutralizing antibody                                        | R&D systems, MN                     | AB206        |
| anti-TGFβ neutralizing antibody                                       | R&D systems, MN                     | MAB1835      |
| anti-CD73                                                             | Sigma-Aldrich, MO                   | HPA017357    |
| anti-Oct 3/4                                                          | Santa Cruz Biotechnology Inc, CA    | H314         |
| anti-Nanog                                                            | BD Pharmingen, CA                   | 560482       |
| anti-Sox2                                                             | R&D systems, MN                     | MAB2018      |
| anti-Flag                                                             | Sigma-Aldrich, MO                   | F3165        |
| anti-EpCAM(FITC)                                                      | Stem Cell Technology Inc, Canada    | 10109        |
| goat anti-Rabbit secondary antibody (Alexa 647)                       | Invitrogen, CA                      | A-21244      |
| anti-TRA-1-60                                                         | Abcam, United Kindom                | ab16288      |
| anti-TRA-1-81                                                         | Abcam, United Kindom                | ab16289      |
| anti-Flag                                                             | Sigma-Aldrich, MO                   | F3165        |
| anti-Stat3                                                            | Cell signaling, MA                  | 4900         |
| anti-p-Stat3                                                          | Cell signaling, MA                  | 9145S        |
| anti-Jnk                                                              | Santa Cruz Biotechnology Inc, CA    | SC-6254      |
| anti-Jak2                                                             | Santa Cruz Biotechnology Inc, CA    | SC-16566     |
| <b>for immunohistochemistry</b>                                       |                                     |              |
| anti-CD73                                                             | Novus Bio, CA                       | NBP1-4749    |
| anti-CD90                                                             | Abcam, United Kindom                | ab92574      |
| anti-EpCAM                                                            | Abcam, United Kindom                | ab124825     |
| anti-Sox2                                                             | Cell signaling, MA                  | 3579S        |
| anti-Oct3/4                                                           | Epitomics, CA                       | AC-0128      |
| anti-Nanog                                                            | Cell signaling, MA                  | 4903s        |
| <b>TAQMAN PROBES AND PCR REAGENTS</b>                                 |                                     |              |
| CD73 Taqman probe                                                     | Applied Biosystems, CA              | HS00159686   |
| Oct3/4 Taqman probe                                                   | Applied Biosystems, CA              | HS00999632   |
| Nanog Taqman probe                                                    | Applied Biosystems, CA              | HS02387400   |
| Sox2 Taqman probe                                                     | Applied Biosystems, CA              | HS01053049   |
| AdoRa 2b Taqman probe                                                 | Applied Biosystems, CA              | HS00386497   |
| AdoRa 2a Taqman probe                                                 | Applied Biosystems, CA              | HS00169123   |
| AdoRa 1 Taqman probe                                                  | Applied Biosystems, CA              | HS00379752   |
| AdoRa 3 Taqman probe                                                  | Applied Biosystems, CA              | HS00252933   |
| FABP4 Taqman probe                                                    | Applied Biosystems, CA              | HS01086177   |
| PPARγ Taqman probe                                                    | Applied Biosystems, CA              | HS011155112  |
| glucuronidase B Taqman probe                                          | Integrated DNA Technologies Inc, IA | custom       |
| 2x SsoFast master mix                                                 | Bio-Rad Laboratories, CA            | 172-5233     |
| IL6 Taqman probe                                                      | Applied Biosystems, CA              | HS00985639   |
| <b>KITS</b>                                                           |                                     |              |
| Transcription factor buffer set                                       | eBioscience, CA                     | 00-5523      |
| Adipogenesis Differentiation Kit                                      | GiBCO, CA                           | A10070-10    |
| Osteogenesis Differentiation Kit                                      | GiBCO, CA                           | A10072-01    |
| IL6 Duo-Set ELISA kits                                                | R&D systems, MN                     | DY206        |
| Power-Stain™ 1.0 double stain kit I                                   | Genemed Biotechnologies Inc, CA     | 52-0023      |
